# Supplementary material
Source: Research Square preprint supplement (doi:10.21203/rs.3.rs-9216062/v1)
Supplement: Supplementary file 1 [file e0133b576cbfdfe1b9851560.docx]

**Supplementary Information**

**Clean water pathways under devolved water provision: Access, affordability and decentralized innovations in Kenya**

Daniel King1,†, Deidra Miniard,2,†, Abby Chapman3, Joseph Cobos Portillo Jr.3, Prachi Ramkrishna Mehendale3, RJ Vogler1, Faith Nzilu4, Sylvia Mutunga4, Tabitha Kimeu4, Joy Muriungi4, David Kimaili4, Jennifer Mae Pierce1, Carly R. Barnett1, Aarya Manoj Nair5, Isabella Lynn Tran6, Kelsey Kemunto Nyandusi5, Shriya Sai Mukkavilli6, Suhani Nimesh Gajera6, Jayline Garza6, Davina Tran7, Carter Belle Heslam3, Shrika Paramasivam8, Elena Talarico Ribeiro8, Amit Maheswari9, Habsa Mohamed Aydid8, Anya Choudhary3, Sana Zahra Haider1, Nadya Alon Harris3, Juliet Frances Ippolito1, Arnav Karnik6, Shelly Nizza Kleinerman1, Satvik Raghunathan3, Natalie Sherman3, Desmond Obala4, Mercy Cheruto4, Matheaus Kauti4, *, Manish Kumar1,3,*, R. Patrick Bixler2,*

1McKetta Department of Chemical Engineering, The University of Texas at Austin, Austin, Texas 78712, United States.

2Lyndon B. Johnson School of Public Affairs, The University of Texas at Austin, Austin, Texas 78712, United States.

3MaseehDepartment of Civil, Architectural and Environmental Engineering, The University of Texas at Austin, Austin, Texas 78712, United States.

4 Department of Environment and Land Resources Management, Southeastern Kenya University, Kitui, Kenya

5McCombs School of Business, The University of Texas at Austin, Austin, Texas 78712, United States.

6College of Natural Sciences, The University of Texas at Austin, Austin, Texas 78712, United States.

7Department of Biomedical Engineering, The University of Texas at Austin, Austin, Texas 78712, United States.

8Walker Department of Mechanical Engineering, The University of Texas at Austin, Austin, Texas 78712, United States.

8Department of Geography & the Environment, The University of Texas at Austin, Austin, Texas 78712, United States.

9Tower Fellows Program, The University of Texas at Austin, Austin, Texas 78712, United States.

†Authors contributed equally to this work.

*Corresponding authors

**Table of Contents**

[1. Study Sample Information 4](#_Toc220785629)

[2. Water Source Descriptive Statistics 6](#_Toc220785630)

[3. Missing Data Estimation 7](#_Toc220785631)

[4. Participant Demographics 8](#_Toc220785632)

[5. Calculations for cost of water in Texas. 9](#_Toc220785633)

[5. Citations 10](#_Toc220785634)

# 1. Study Sample Information

SI Table 1 below shows the number of observations by location and survey wave. The unit of analysis is water source (as participants could list more than one water source). The SWF column indicates which locations have SWF access.

| **SI Table 1.** Sample size by survey wave and study location, using water source as unit of analysis. Towns with solar water farms (SWF) are identified. | | | | | | |
| --- | --- | --- | --- | --- | --- | --- |
|  | **Water Source as Unit of Analysis** | | | | | |
| **Town** | **2023** | **2024** | **2025** |  | **Sample** | **SWF** |
| Wote | 214 | 253 |  |  | 467 | Yes |
| Kitengela | 104 |  |  |  | 104 | Yes |
| Kwa Vonza |  | 201 |  |  | 201 | No |
| Wamunyu |  | 96 |  |  | 96 | No |
| Ukunda (Diani) |  |  | 82 |  | 82 | Yes |
| Bamburi (Mombasa) |  |  | 93 |  | 93 | Yes |
| Jomvu (Mombasa) |  |  | 50 |  | 50 | No |
| Likoni (Mombasa) |  |  | 91 |  | 91 | No |
| Mikindani (Mombasa) |  |  | 159 |  | 158 | Yes |
| Miritini (Mombasa) |  |  | 110 |  | 110 | No |
| Mshomoroni (Mombasa) |  |  | 82 |  | 82 | Yes |
| Mtongwe (Mombasa) |  |  | 80 |  | 80 | Yes |
| Tudor (Mombasa) |  |  | 25 |  | 25 | No |
| **Total** | 318 | 550 | 772 |  | 1640 |  |

SI Figure 1 shows the distribution of water sources by location across all three survey waves. All neighborhoods in Mombasa were combined into 1 category. In SI Figure 2, we show only the neighborhoods in Mombasa.

**
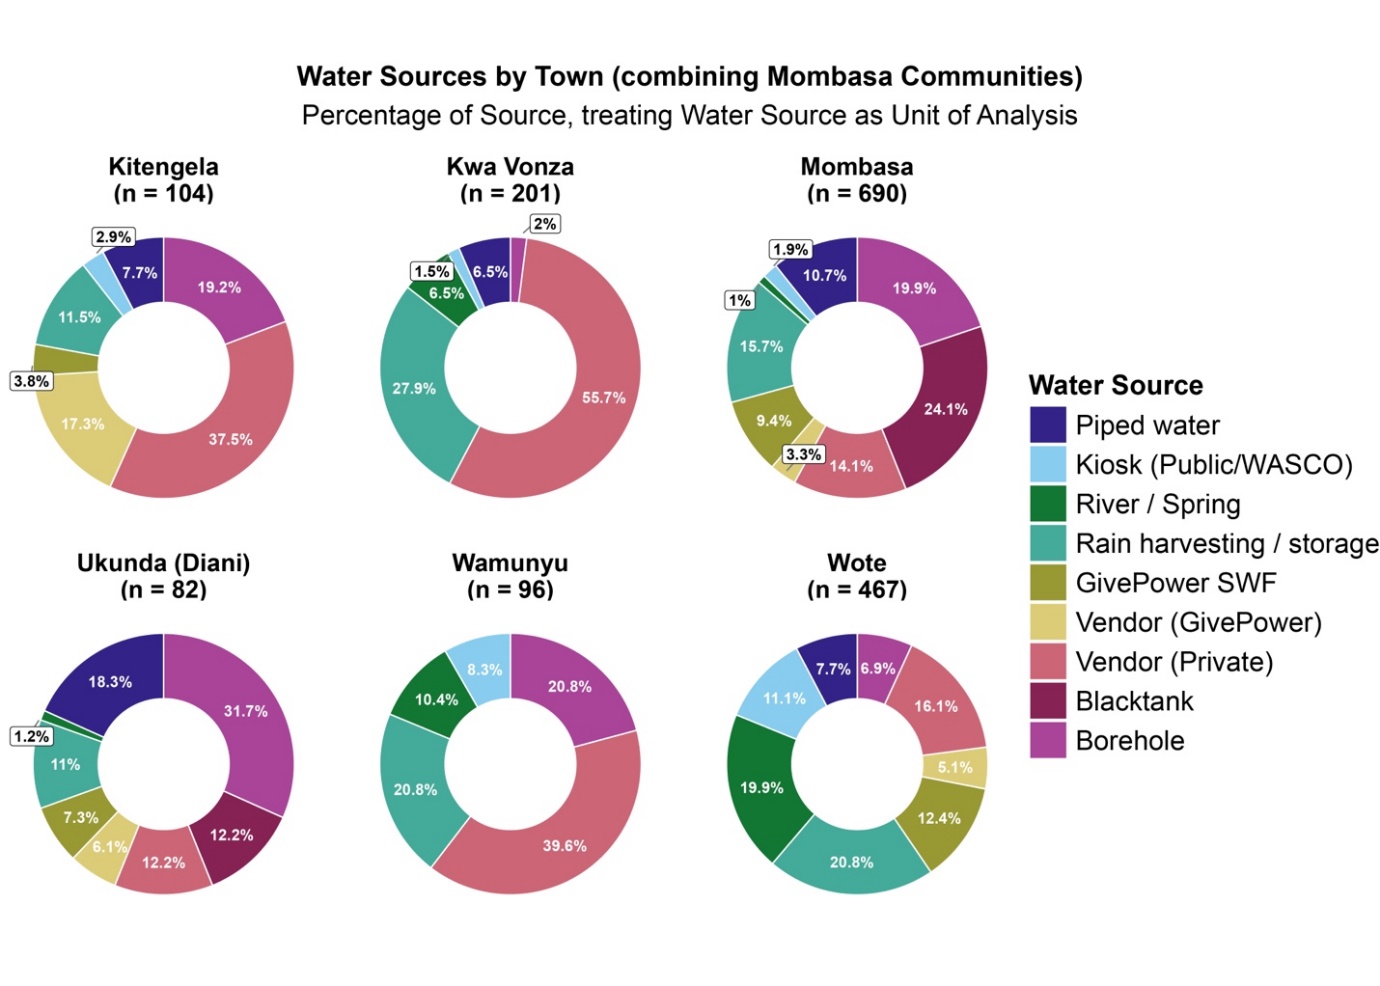
**

**SI Figure 1.** Distribution of water sources accessed by city across 2023,2024, and 2025.

**
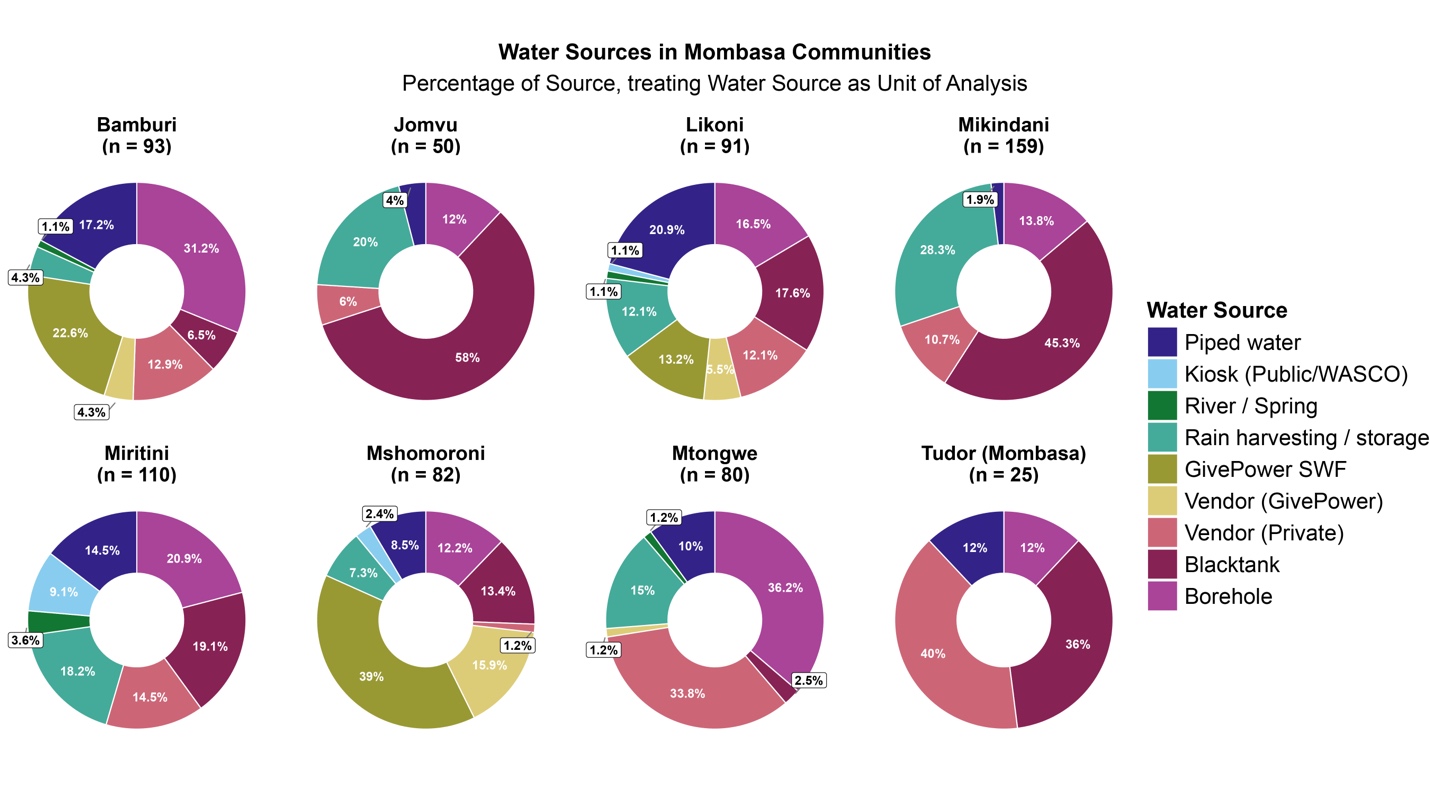
**

**SI Figure 2** Distribution of water sources accessed within Mombasa by district in 2025.

# 2. Water Source Descriptive Statistics

Table 2 below provides descriptive statistics for each water source. Percent of participants is the percentage of survey takers who indicated each water source. Percent of total observations is percentage based on water source as unit of analysis. Percent reporting illness is the percentage of observations that were associated with at least one reported illness. Average cost, distance, and time are shown with the standard deviation in parentheses. Trust source is the percentage of observations for which participants indicated they trusted the water source.

**SI Table 2.** sample size for each water source treating water source as unit of analysis. Descriptive statistics are provided for cost, distance, and time.

| **Water source** | **N** | **% of partici-pants** | **% of obser-vations** | **% Reporting Illness** | **Avg Cost (KES per 20 liters)** | **Avg Distance (km)** | **Avg Time (min)** | **% Trust Source** |
| --- | --- | --- | --- | --- | --- | --- | --- | --- |
| Rain harvesting / storage | 302 | 37.3% | 18.4% | 34.1% | 5.71  (14.69) | 0.00  (0.06) | 0.05  (0.86) | 39.3% |
| Vendor (Private) | 371 | 39.5% | 22.6% | 31.8% | 48.95  (63.86) | 0.65  (1.80) | 7.90  (15.17) | 43.8% |
| Vendor (GivePower) | 70 | 8.7% | 4.3% | 24.3% | 49.94  (33.76) | 0.78  (1.60) | 7.45  (10.83) | 84.9% |
| GivePower SWF | 133 | 16.1% | 8.1% | 12.0% | 25.65  (15.12) | 2.45  (10.00) | 13.92  (16.23) | 95.8% |
| Borehole | 239 | 29.2% | 14.6% | 31.4% | 10.14  (11.77) | 0.99  (2.50) | 13.49  (33.10) | 42.7% |
| Blacktank | 176 | 19.1% | 10.7% | 40.9% | 16.86  (13.73) | 0.50  (0.98) | 7.08  (9.55) | 37.4% |
| River / spring | 124 | 15.6% | 7.6% | 25.8% | 13.63  (18.72) | 1.81  (2.83) | 26.47  (49.84) | 45.2% |
| Piped water | 146 | 17.9% | 8.9% | 20.6% | 14.18 (19.54) | 0.19  (0.97) | 2.83  (7.11) | 50.4% |
| Kiosk / WASCO | 79 | 9.9% | 4.8% | 22.8% | 15.70  (24.08) | 5.31  (28.14) | 9.81  (11.92) | 48.2% |

# 3. Missing Data Estimation

The table below compares the imputed datasets to the original datasets using the mean and standard deviation for cost, distance, and time. We compared K-Nearest Neighbor estimates to predictive mean matching via the MICE package, as well as original data. The mean and standard deviation were comparable across both imputation methods; however, K-Nearest Neighbor resulted in more confident estimates.

This comparison shows that imputed datasets do not differ much from the original data that includes missing observations - with the exception of rain harvesting which has a higher average cost in the imputed datasets. The cost for piped water that is substantially lower under KNN (14.18) was also cleaned by removing a set of outliers that significantly increased the mean; where the median was approximately 10 KES, with the majority of observations below 35 KES, a value of 2000, and a subset of values above 250 pulled the average up considerably and were re-estimated using KNN methods.

Predictive mean matching estimates missing values by fitting a regression model using complete cases to predict the variable that is missing. Twenty datasets were imputed, and estimates were pooled to create one final dataset. KNN predicts values for a missing observation based on its k-closest neighbors (we used 5) which identifies similar data points and predicts a value based on those similar observations.

**SI Table 2:** Compare mean and standard deviation of cost, time, and distance by source across PMM, KNN, and original data with listwise deletion for missing values.

|  | **Cost** | | | **Distance** | | | **Time** | | |
| --- | --- | --- | --- | --- | --- | --- | --- | --- | --- |
| **Water Source** | **Cost Original** | **Cost KNN** | **Cost PMM** | **Distance Original** | **Distance KNN** | **Distance PMM** | **Time Original** | **Time KNN** | **Time PMM** |
| Piped water | 76.55 (217.46) | 14.18 (19.54) | 74.96 (204.2) | 0.19  (0.97) | 0.2  (0.93) | 0.22 (0.94) | 2.83 (7.11) | 2.83 (7.06) | 2.84 (7.06) |
| Kiosk (Public /WASCO) | 15.83 (24.2) | 15.7 (24.08) | 15.89 (24.05) | 5.31 (28.14) | 4.25 (24.97) | 4.83 (24.93) | 9.81 (11.92) | 9.53 (11.6) | 9.84 (11.58) |
| River / Spring | 13.49 (19.02) | 13.63 (18.72) | 13.43 (18.63) | 1.81  (2.83) | 1.71  (2.72) | 1.79 (2.71) | 26.47 (49.84) | 25.57 (48.56) | 27.21 (48.91) |
| Rain harvesting / storage | 0.62 (5.88) | 5.71 (14.69) | 4.31 (10.71) | 0  (0.06) | 0  (0.06) | 0  (0.06) | 0.05 (0.86) | 0.05 (0.86) | 0.05 (0.86) |
| GivePower SWF | 25.79 (15.33) | 25.65 (15.12) | 25.86 (15.18) | 2.45  (10) | 2.27  (9.11) | 2.5  (9.15) | 13.92 (16.23) | 13.99 (15.79) | 15.37 (17.13) |
| Vendor (GivePower) | 49.94 (33.76) | 49.94 (33.76) | 49.94 (33.76) | 0.78  (1.6) | 0.74  (1.5) | 0.91 (1.64) | 7.45 (10.83) | 7.48 (10.41) | 7.84 (10.52) |
| Vendor (Private) | 48.9 (64.26) | 48.95 (63.86) | 49.27 (64.21) | 0.65  (1.8) | 0.64  (1.74) | 0.66 (1.77) | 7.9 (15.17) | 7.97 (14.84) | 8.06 (14.97) |
| Blacktank | 16.93 (13.74) | 16.86 (13.73) | 16.89 (13.71) | 0.5  (0.98) | 0.5  (0.92) | 0.54 (0.94) | 7.08 (9.55) | 7.1 (9.49) | 7.17 (9.56) |
| Borehole | 10.21 (12.06) | 10.14 (11.77) | 10.61 (11.93) | 0.99  (2.5) | 0.94  (2.36) | 1  (2.37) | 13.49 (33.1) | 13.13 (32.23) | 13.5 (32.26) |

# 4. Participant Demographics

SI Tables 3, 4, and 5 below provide information about participants across all three survey waves.

**SI Table 3.** Descriptive statistics for participants’ monthly income, rent, and household size.


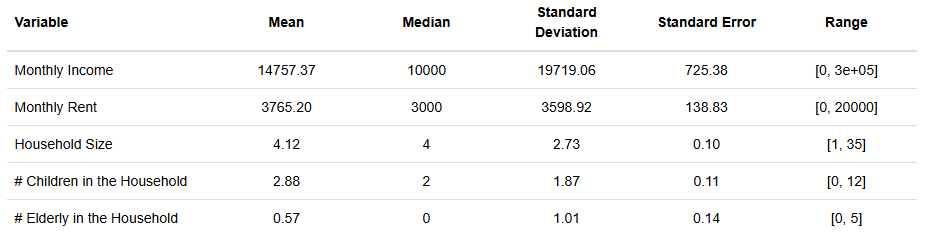


**SI Table 4**. Distribution of monthly income range.


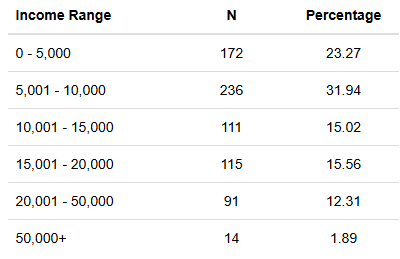


**SI Table 5**. Gender distribution of survey takers and head of household.


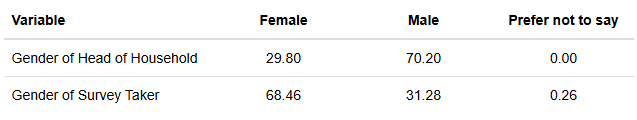


# 5. Calculations for cost of water in Texas.

The average monthly consumption in the state of Texas is 6006 gallons at the cost of $52.91 per month1. 6006 gallons = 22,735.17 L. Using a conversion of 128.9 KSH to USD, $51.91 = 6,820.1 KSH. Cost per Liter = \frac{6,820.10}{22,735.17 } \approx 0.29998 \text{ KSH/L}

# 5. Citations

[1] Texas Municipal League. (2023). *2023 Water & wastewater survey results*. <https://www.tml.org/229/Water-Wastewater-Survey-Results>
